# Supplementary material for: A Novel Method to Achieve Precision and Reproducibility in Exposure Parameters for Low-Frequency Pulsed Magnetic Fields in Human Cell Cultures
Source: MDPI journal article supplement (doi:10.3390/bioengineering9100595), 2022-10-21

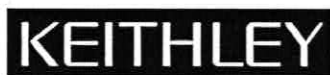

A Tektronix Company

A Greater Measure of Confidence

TRACEABLE CALIBRATION

DAQ6510, 4455554

Cal Date: 18-FEB-2020

Cal Due: Lab: Kei

KEITHLEY

KEITHLEY INSTRUMENTS, INC \* 28775 AURORA RD, CLEVELAND, OHIO - USA \* 440-248-0400 \* Fax: 440-248-6168 \* 1-888-KEITHLEY \* www.keithley.com

Calibration Facility: This product was calibrated for Keithley Instruments by

Tektronix (China) Co. Ltd., 1227 Chuan Qiao Road, Pudong New District, Shanghai, China 201206

## Calibration Certificate

Certificate No: PC8K1274HF2

Manufacturer: Keithley

Description: Switch Multimeter

Calibration Date: 18-FEB-2020

Revision: 00

Model: DAQ6510

Temperature: 23.0 °C

Date Placed In Service: \* Due Date: \*

Serial No: 4455554

Humidity: 34 %

\* Optional customer entry fields: The due date may be established by adding the Keithley recommended cal interval stated in the product manual to the "Date placed in service"

Initial Condition: Not applicable, new product

Final Condition: In Tolerance

- Keithley Instruments, Inc. certifies that the above instrument meets its published measurement specifications.
- This instrument has been calibrated using measurement standards traceable to the International System of Units (SI) through the PRC National Institute of Metrology (NIM), or other National Metrology Institutes (such as NIST, NPL, PTB, etc.).
- The policies and procedures used for the calibration of this product are based upon ANSI/NCSL Z540.1-1994 (R2002).
- The quality system used by the calibration facility is ISO 9001:2015 registered.
- This calibration is a direct comparison of the unit under test to the listed reference standards and did not involve any sampling plans to complete. No allowance has been made for the instability of the test device due to use, time, etc. Such allowances would be made by the customer as needed.
- This calibration certificate shall not be reproduced, except in full, without the written approval of Keithley Instruments, Inc.

Calibration Procedure Used: MANIFEST:Product\_Dmm\_2012-KeithleyDMMs\_Full VERSION:86

### Calibration Standards Used:

| Manufacturer/Model       | Model Description               | ID Number | Due Date    |
|--------------------------|---------------------------------|-----------|-------------|
| Fluke 5725A              | Power Amplifier                 | KI6652    | 30-Jun-2020 |
| Fluke 5730A              | Multifunction Calibrator        | KI10627   | 29-Dec-2020 |
| Fluke 8508A              | Digital Multimeter              | KI10606   | 09-Oct-2020 |
| IET Labs 1423-A          | Decade Capacitor                | KI198481  | 21-May-2020 |
| IET Labs HACS-Z-A-3E-1uF | Decade Capacitance Substituter  | KI198482  | 21-May-2020 |
| Keithley 3390            | Function/Arbitrary Waveform Gen | KI10632   | 15-Nov-2020 |

Issued By:

Quality Director:

LI Yongdong

Certified By: Yuzhong Tian

Date Issued: 19-FEB-2020

DAQ6510 4455554

Page 1 of 1

PA-1061B

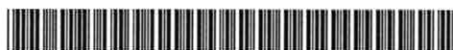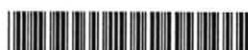

Supplement: s1 [file s1]
