# Supplementary material for: A Novel Method to Achieve Precision and Reproducibility in Exposure Parameters for Low-Frequency Pulsed Magnetic Fields in Human Cell Cultures
Source: MDPI journal article supplement (doi:10.3390/bioengineering9100595), 2022-10-21
Supplement: s1 [file s1]

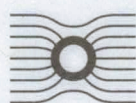

**Stefan Mayer Instruments**

Fluxgate Magnetometers & more

## KALIBRIERZERTIFIKAT

Modell: **Fluxgate-Magnetometer FLUXMASTER**

Seriennummer: **508**

Datum der Kalibrierung: 01. Juni 2018

Umgebungstemperatur: 20 °C ± 1 °C

Kalibrierung durchgeführt von: R. Smolenski

### Messmittel

| Messmittel                   | Nummer       | kalibriert am | kalibriert durch          |
|------------------------------|--------------|---------------|---------------------------|
| Helmholtzspule Durchm. 64 cm | 26811 PTB 15 | 1. 10. 2015   | PTB Braunschweig          |
| Strommessgerät Keithley 2000 | 0601390      | 16. 10. 2017  | Keithley Instruments GmbH |

### Messmethode

Der Sensor des Magnetometers wurde im Zentrum der Helmholtzspule positioniert und entlang der Spulenachse ausgerichtet. Es wurden unterschiedliche Ströme in die Spule eingeprägt. Der Anteil des Erdmagnetfeldes wurde durch Umpolen der Stromquelle und Differenzbildung der Messwerte kompensiert. Der Nullpunktfehler wurde mit Hilfe einer dreifachen Mumetallabschirmung bestimmt.

### Messergebnisse

| Messbereich | Sollwert +/-0,5% | Messwert vor Kalibrierung | Messwert nach Kalibrierung |
|-------------|------------------|---------------------------|----------------------------|
| 1           | 200,0 µT         | 200,7 µT +/-0,1 µT        | 200,0 µT +/-0,1 µT         |
| 2           | 20,00 µT         | 20,09 µT +/-0,01 µT       | 20,00 µT +/-0,01 µT        |
| 3           | 2,000 µT         | 2,007 µT +/-0,005 µT      | 2,000 µT +/-0,005 µT       |
| Nullpunkt   | 0 +/-5 nT        | 2 nT +/-5 nT              | 0 nT +/-5 nT               |

Dieses Kalibrierzertifikat dokumentiert die Rückführbarkeit auf nationale Standards.

Dinslaken, den 01. Juni 2018

Stefan Mayer Instruments

*P. Glasenapp*

(Dr. Philipp Glasenapp)

**Stefan Mayer Instruments**

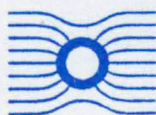

GmbH & Co. KG, Wallstr. 7  
46535 Dinslaken, Germany  
Tel./Fax +49 2064 479762/3  
mail@stefan-mayer.com

Stefan Mayer Instruments GmbH & Co. KG  
Wallstraße 7 • D-46535 Dinslaken • Deutschland  
Telefon: +49 (0)2064 479762  
Telefax: +49 (0)2064 479763  
[www.stefan-mayer.com](http://www.stefan-mayer.com) • [mail@stefan-mayer.com](mailto:mail@stefan-mayer.com)

AG Duisburg HRA 12336 • Persönlich haftende Gesellschafterin:  
Stefan Mayer Verwaltungs GmbH • Sitz Dinslaken • AG Duisburg HRB 30336  
Geschäftsführer: Dipl.-Phys. Dr. Stefan Mayer  
USt-IdNr.: DE 315972918 • WEEE-Reg-Nr.: DE 67865463  
Commerzbank AG • IBAN: DE72 3564 0064 0610 5589 00 • BIC: COBADEFFXXX
