# Supplementary material for: A Novel Method to Achieve Precision and Reproducibility in Exposure Parameters for Low-Frequency Pulsed Magnetic Fields in Human Cell Cultures
Source: MDPI journal article supplement (doi:10.3390/bioengineering9100595), 2022-10-21
Supplement: s1 [file s1]

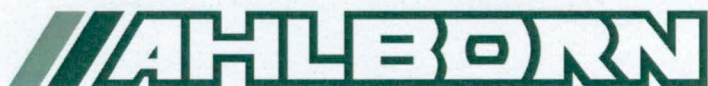

# Ahlborn Mess und Regelungstechnik GmbH

akkreditiert durch die / accredited by the

**Deutsche Akkreditierungsstelle GmbH**

als Kalibrierlaboratorium im / as calibration laboratory in the

**Deutscher Kalibrierdienst**

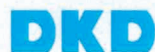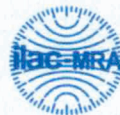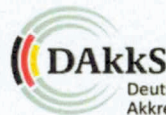

Deutsche  
Akkreditierungsstelle  
D-K-19342-01-00

Kalibrierschein  
Calibration Certificate

Kalibrierzeichen  
Calibration mark

|                     |
|---------------------|
| 0105                |
| D-K-<br>19342-01-00 |
| 2018-02             |

Gegenstand  
Object

**Pt100 Temperaturfühler mit Messgerät  
System ALMEMO®**

Hersteller  
Manufacturer

**Ahlborn Mess- und Regelungstechnik GmbH**

Typ  
Type

Anzeigegerät: **MA2690-8A**  
Fühler: **FPA22L0100**

Fabrikat/Serien-Nr.  
Serial number

Anzeigegerät: **H18020035**  
Fühler: **---**

Auftraggeber  
Customer

**Sachtleben GmbH  
DE-20251 Hamburg**

Auftragsnummer  
Order No.

**4064052**

Anzahl der Seiten des Kalibrierscheines  
Number of pages of the certificate

**2**

Datum der Kalibrierung  
Date of calibration

**20.02.2018**

Dieser Kalibrierschein dokumentiert die Rückführung auf nationale Normale zur Darstellung der Einheiten in Übereinstimmung mit dem Internationalen Einheitensystem (SI). Die DAkkS ist Unterzeichner der multilateralen Übereinkommen der European co-operation for Accreditation (EA) und der International Laboratory Accreditation Cooperation (ILAC) zur gegenseitigen Anerkennung der Kalibrierscheine. Für die Einhaltung einer angemessenen Frist zur Wiederholung der Kalibrierung ist der Benutzer verantwortlich.

*This calibration certificate documents the traceability to national standards, which realize the units of measurement according to the International System of Units (SI). The DAkkS is signatory to the multilateral agreement of the European co-operation for Accreditation (EA) and of the International Laboratory Accreditation Cooperation (ILAC) for the mutual recognition of calibration certificates. The user is obliged to have the object recalibrated at appropriate intervals.*

Dieser Kalibrierschein darf nur vollständig und unverändert weiterverbreitet werden. Auszüge oder Änderungen bedürfen der Genehmigung sowohl der Deutschen Akkreditierungsstelle GmbH als auch des ausstellenden Kalibrierlaboratoriums. Kalibrierscheine ohne Unterschrift haben keine Gültigkeit.

*This calibration certificate may not be reproduced other than in full except with the permission of both the Deutsche Akkreditierungsstelle GmbH and the issuing laboratory. Calibration certificates without signature are not valid.*

Datum  
Date

Leiter / stellv. Leiter des Kalibrierlaboratoriums  
Head / Deputy Head of the calibration laboratory

Bearbeiter  
Person in charge

20.02.2018

Dipl. Ing. R. Waldera

N. Wacker

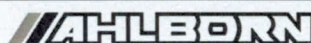

AHLBORN Mess- und Regelungstechnik GmbH • Eichenfeldstr 1-3 • D- 83607 Holzkirchen

Tel.: +49(0)8024/3007-0 • Fax.: +49(0)8024/3007-10 • Internet: www.ahlborn.de • email: amr@ahlborn.de



**Kalibriergegenstand:** Pt100- Temperaturfühler mit Messgerät  
Auflösung 0,001 °C /M00

**Kalibrierverfahren:** Die Kalibrierung erfolgte durch direkten Vergleich der durch das Bezugsnormal dargestellten Messwerte mit den Messwerten des Prüflings.

**Referenznormale:** AKF009      Temperaturnormal      DAkkS-D-K-15219-01-00-2073

**Messbedingungen:** Kalibrierung im Flüssigkeitsbad  
Eintauchtiefe: 100 mm

Korrekturwerte (ALMEMO®):

NK: 0,119

SK: 0,9972

|                       |         |          |
|-----------------------|---------|----------|
| Umgebungstemperatur:  | 25 °C   | ± 2 °C   |
| Umgebungsluftfeuchte: | 24 %    | ± 5 %    |
| Luftdruck:            | 933 hPa | ± 10 hPa |

**Messergebnisse:**

| Temperatur         |                        |                 |                       |
|--------------------|------------------------|-----------------|-----------------------|
| Referenzwert<br>°C | Anzeige Prüfling<br>°C | Abweichung<br>K | Messunsicherheit<br>K |
| 18,065             | 18,074                 | 0,009           | 0,040                 |
| 37,002             | 37,013                 | 0,011           | 0,040                 |
| 44,986             | 44,989                 | 0,003           | 0,040                 |
| 60,004             | 60,003                 | -0,001          | 0,040                 |

**Messunsicherheit:** Angegeben ist die erweiterte Messunsicherheit, die sich aus der Standardmessunsicherheit durch Multiplikation mit dem Erweiterungsfaktor  $k = 2$  ergibt. Sie wurde gemäß DAkkS-DKD-3 ermittelt. Der Wert der Messgröße liegt mit einer Wahrscheinlichkeit von 95 % im zugeordneten Werteintervall. Ein Anteil für die Langzeitstabilität und das Hystereseverhalten des Kalibriergegenstandes ist nicht enthalten.
