# Supplementary material for: A Novel Method to Achieve Precision and Reproducibility in Exposure Parameters for Low-Frequency Pulsed Magnetic Fields in Human Cell Cultures
Source: Bioengineering (Basel). 2022 Oct 21;9(10):595. doi: 10.3390/bioengineering9100595 (PMC9598188; doi:10.3390/bioengineering9100595)
Supplement: Supplementary file 1 [file bioengineering-09-00595-s001.zip]

Archive with 5 entries (5 files):
- KeithleyDAQ6510.pdf
- Pt100FPA22L0100.pdf
- Raw-Data.xlsx
- StefanMeyerInstruments-Fluxmaster.pdf
- Supplement.pdf
