# Supplementary material for: A Novel Method to Achieve Precision and Reproducibility in Exposure Parameters for Low-Frequency Pulsed Magnetic Fields in Human Cell Cultures
Source: Bioengineering (Basel). 2022 Oct 21;9(10):595. doi: 10.3390/bioengineering9100595 (PMC9598188; doi:10.3390/bioengineering9100595)
Supplement: Supplementary file 1 [file bioengineering-09-00595-s001.zip › Raw-Data.xlsx]

## Sheet: Summary
				Control		Exposure
		N	n	Q No-LPS	Q LPS	Q No-LPS	Q LPS
HEKBlue_016	Sham	1	1	0.0829187	0.416532	0.0910714	0.412926
			2	0.0812183	0.37987	0.0834879	0.385484
			3	0.084507	0.46595	0.0891266	0.435374
			4	0.0905588	0.375433	0.0865385	0.395604
			5	0.0729335	0.389085	0.0784641	0.394595
HEKBlue_017	Sham	2	1	0.106029	0.378613	0.100971	0.404971
			2	0.11215	0.4368	0.10559	0.434146
			3	0.105505	0.460595	0.104265	0.478921
			4	0.10643	0.385084	0.0893536	0.487342
			5	0.107551	0.423408	0.105634	0.521104
HEKBlue_018	Sham	3	1	0.0744382	0.358936	0.0677507	0.365714
			2	0.0727848	0.349296	0.0717423	0.378299
			3	0.0657143	0.357435	0.0657143	0.380342
			4	0.069209	0.328395	0.071875	0.364943
			5	0.0708783	0.384844	0.0729335	0.313468
HEKBlue_019	Sham	4	1	0.0897666	0.388385	0.0910714	0.389916
			2	0.0947776	0.484472	0.113978	0.463178
			3	0.0991561	0.627204	0.0877863	0.488048
			4	0.0857664	0.441774	0.0895238	0.533784
			5	0.0941176	0.529289	0.106838	0.716456
HEKBlue_020	Sham	5	1	0.0852995	0.40099	0.0746501	0.388982
			2	0.0833333	0.433892	0.073132	0.403509
			3	0.0810373	0.473214	0.0892193	0.515209
			4	0.0746032	0.438687	0.0825853	0.389163
			5	0.0901804	0.469925	0.0898662	0.537037
HEKBlue_011	f=10Hz, D=50%	1	1	0.0810373	0.390953	0.0862355	0.251613
			2	0.0782473	0.39966	0.0793157	0.327014
			3	0.0732087	0.514096	0.0852843	0.268882
			4	0.0758514	0.300314	0.0765625	0.247557
			5	0.0760518	0.356209	0.0816327	0.232855
HEKBlue_012	f=10Hz, D=50%	2	1	0.0942761	0.396007	0.0909091	0.327645
			2	0.0810345	0.402482	0.0823117	0.245098
			3	0.0813559	0.445008	0.0697306	0.378788
			4	0.0834783	0.370492	0.0791367	0.248756
			5	0.0769231	0.442857	0.0765217	0.321489
HEKBlue_013	f=10Hz, D=50%	3	1	0.106838	0.46595	0.105051	0.354717
			2	0.0823529	0.468864	0.0914077	0.334579
			3	0.110629	0.544304	0.104208	0.383838
			4	0.0829103	0.532228	0.0867257	0.341509
			5	0.10101	0.563953	0.0957854	0.340149
HEKBlue_014	f=10Hz, D=50%	4	1	0.113248	0.451613	0.10303	0.349057
			2	0.0773109	0.487179	0.0840951	0.353271
			3	0.106291	0.518072	0.0961924	0.346715
			4	0.0795262	0.456722	0.0867257	0.324723
			5	0.0909091	0.505814	0.0900383	0.332714
HEKBlue_015_1	f=10Hz, D=50%	5	1	0.0883281	0.353312	0.0841121	0.342903
			2	0.068254	0.411111	0.0711974	0.348983
			3	0.0661654	0.449456	0.0705706	0.364393
			4	0.0694239	0.574501	0.0682171	0.322157
			5	0.0671642	0.572568	0.0672783	0.321212
HEKBlue_015_2	f=10Hz, D=50%	6	1	0.0637191	0.429652	0.0635538	0.231742
			2	0.0672269	0.395664	0.0659062	0.273264
			3	0.060567	0.378082	0.0668524	0.267994
			4	0.0614379	0.374693	0.0632258	0.250611
			5	0.0764526	0.505852	0.0647887	0.406202
HEKBlue_015_3	f=10Hz, D=50%	7	1	0.0596628	0.422485	0.0591716	0.346207
			2	0.0582011	0.487075	0.0658915	0.310044
			3	0.0538847	0.508403	0.0556274	0.29798
			4	0.0545906	0.441678	0.0595399	0.313754
			5	0.0649718	0.533608	0.0595745	0.33967
HEKBlue_033_1	f=10Hz, D=50%	8	1	0.104317	0.798165	0.095986	0.623824
			2	0.0912281	0.7632	0.098472	0.580547
			3	0.101375	0.866972	0.0913621	0.592767
			4	0.0993031	0.842373	0.0934426	0.556886
			5	0.0978648	0.959866	0.0977312	0.657556
HEKBlue_021_1	f=19Hz, D=50%	1	1	0.0586283	0.264151	0.0747051	0.203647
			2	0.0607287	0.26087	0.0637363	0.275218
			3	0.0662252	0.205466	0.0684455	0.317147
			4	0.0739884	0.312789	0.0739796	0.293179
			5	0.0775095	0.283843	0.0640177	0.218884
HEKBlue_021_2	f=19Hz, D=50%	2	1	0.0748201	0.37931	0.0649867	0.362092
			2	0.0618421	0.386395	0.0601966	0.345646
			3	0.065123	0.372688	0.0578818	0.360274
			4	0.0616175	0.373766	0.0590501	0.361299
			5	0.0607595	0.400881	0.0637191	0.407186
HEKBlue_021_3	f=19Hz, D=50%	3	1	0.0564226	0.337975	0.0554348	0.339498
			2	0.0549451	0.320639	0.0540541	0.315857
			3	0.0582404	0.325524	0.0603675	0.318012
			4	0.0578106	0.33375	0.0550688	0.314931
			5	0.0616798	0.321295	0.0596394	0.307311
HEKBlue_021_4	f=19Hz, D=50%	4	1	0.0913884	0.571698	0.10757	0.539474
			2	0.0974729	0.608863	0.0931459	0.554702
			3	0.0967118	0.555769	0.0921986	0.50469
			4	0.0986717	0.599198	0.0913978	0.619503
			5	0.0987203	0.617706	0.0957643	0.608187
HEKBlue_025_1	f=19Hz, D=95%	1	1	0.0815138	0.447025	0.077551	0.316351
			2	0.0764618	0.444275	0.0829563	0.287942
			3	0.0728083	0.334847	0.0722714	0.255702
			4	0.0824261	0.434191	0.0818966	0.312883
			5	0.118846	0.434231	0.0781711	0.297602
HEKBlue_025_2	f=19Hz, D=95%	2	1	0.0882353	0.411594	0.0889571	0.31728
			2	0.0701001	0.417798	0.0735294	0.33429
			3	0.0753012	0.463636	0.0757576	0.335843
			4	0.0823723	0.414379	0.086262	0.350649
			5	0.0790274	0.468571	0.0772798	0.382267
HEKBlue_025_3	f=19Hz, D=95%	3	1	0.0879121	0.419835	0.0894309	0.400703
			2	0.0904437	0.477314	0.0824089	0.413163
			3	0.0918197	0.516484	0.0876623	0.391144
			4	0.0896785	0.513605	0.0947547	0.391162
			5	0.0851789	0.579035	0.0955056	0.427152
HEKBlue_025_4	f=19Hz, D=95%	4	1	0.0914286	0.603352	0.0943396	0.527372
			2	0.0973085	0.589942	0.0956023	0.481481
			3	0.0917969	0.625678	0.098646	0.466312
			4	0.0979592	0.531532	0.0894942	0.444444
			5	0.0995671	0.584942	0.0978723	0.475229
HEKBlue_026_1	f=10Hz, D=26%	1	1	0.0745721	0.39497	0.0796221	0.331152
			2	0.0748299	0.380727	0.0795796	0.406107
			3	0.078635	0.34966	0.0658065	0.369472
			4	0.0693069	0.401899	0.0725926	0.337366
			5	0.0750361	0.398243	0.0773994	0.340054
HEKBlue_026_2	f=10Hz, D=26%	2	1	0.114068	0.415686	0.0932836	0.447479
			2	0.106426	0.441584	0.0934959	0.410463
			3	0.0954955	0.433526	0.0961183	0.417671
			4	0.101215	0.442656	0.0952381	0.420945
			5	0.100952	0.460765	0.0991736	0.406953
HEKBlue_026_3	f=10Hz, D=26%	3	1	0.111304	0.529215	0.083871	0.434992
			2	0.0853859	0.427877	0.0927835	0.477509
			3	0.0854701	0.495812	0.0866551	0.437919
			4	0.0940325	0.511905	0.0869565	0.463211
			5	0.100173	0.478559	0.087395	0.47323
HEKBlue_028	CIT#81	1	1	0.0779412	0.367164	0.0794393	0.325265
			2	0.0678925	0.411093	0.0725076	0.30365
			3	0.0702782	0.373156	0.0699708	0.304154
			4	0.0796178	0.383775	0.0813397	0.319018
			5	0.0807249	0.42355	0.0786517	0.298762
HEKBlue_030_2	CIT#81	2	1	0.0787402	0.526475	0.0821485	0.390805
			2	0.0830389	0.473214	0.0837696	0.373802
			3	0.0946746	0.520833	0.0780488	0.380952
			4	0.0799347	0.503058	0.0794393	0.37541
			5	0.0813149	0.54223	0.0830258	0.473118
HEKBlue_030_3	CIT#81	3	1	0.0922619	0.41963	0.103041	0.434572
			2	0.0825959	0.480607	0.0882801	0.414356
			3	0.102837	0.555178	0.0857143	0.419795
			4	0.0964912	0.580071	0.0957983	0.407767
			5	0.096828	0.572464	0.0892587	0.427885
HEKBlue_030_4	CIT#81	4	1	0.0876897	0.530303	0.0949821	0.443124
			2	0.0876565	0.501736	0.0806452	0.455046
			3	0.0829016	0.571192	0.0856643	0.391053
			4	0.0909091	0.532197	0.0944444	0.408955
			5	0.0849558	0.592721	0.0862385	0.392581
HEKBlue_031_1	CIT#96	1	1	0.0941176	0.312789	0.0770416	0.325123
			2	0.0689655	0.322422	0.0897887	0.321311
			3	0.0742574	0.40159	0.0821678	0.310873
			4	0.0770519	0.301059	0.0747218	0.314239
			5	0.0778146	0.370968	0.0795848	0.333893
HEKBlue_031_2	CIT#96	2	1	0.0868056	0.438111	0.105477	0.457429
			2	0.0865562	0.533461	0.0940499	0.448517
			3	0.0893855	0.473846	0.0910853	0.469156
			4	0.0961538	0.472998	0.0996094	0.417187
			5	0.0977131	0.587477	0.0834846	0.515901
HEKBlue_031_3	CIT#97	3	1	0.0831974	0.338235	0.0859107	0.323333
			2	0.0994371	0.353041	0.105163	0.353659
			3	0.101562	0.364273	0.113949	0.368984
			4	0.102662	0.389474	0.110442	0.347979
			5	0.10625	0.350168	0.103922	0.341794

## Sheet: HEKBlue_016 Sham dil
Software Version	2.04.11
Experiment File Path:	I:\Experiment_zeroF_D.xpt
Protocol File Path:
Plate Number	Plate 1
Date	2021-04-09
Time	13:56:02
Reader Type:	Epoch
Reader Serial Number:	1311121
Reading Type	Reader
Procedure Details
Plate Type	96 WELL PLATE
Read	Absorbance Endpoint
	Full Plate
	Wavelengths: 620
	Read Speed: Normal, Delay: 100 msec, Measurements/Data Point: 8
Results
		1	2	3	4	5	6	7	8	9	10	11	12									Control		Zero Field
	A	0.045	0.046	0.044	0.044	0.045	0.046	0.046	0.044	0.044	0.045	0.045	0.046	620								No-LPS	LPS	No-LPS	LPS
	B	0.045	0.05	0.048	0.048	0.047	0.045	0.257	0.234	0.26	0.217	0.221	0.046	620	620	Control		Zero Field			Average	0.0476	0.2378	0.0476	0.232
	C	0.047	0.051	0.045	0.05	0.045	0.047	0.23	0.239	0.256	0.216	0.219	0.044	620		No-LPS	LPS	No-LPS	LPS		SD.N	0.00162481	0.017837	0.002498	0.014519
	D	0.045	0.045	0.045	0.045	0.045	0.046	0.047	0.045	0.045	0.045	0.047	0.046	620		0.05	0.257	0.051	0.23		SE	0.000726636	0.00797697	0.00111714	0.00649307
	E	0.055	0.045	0.045	0.045	0.045	0.046	0.045	0.047	0.049	0.045	0.045	0.047	620		0.048	0.234	0.045	0.239		Substract		0.1902		0.1844
	F	0.044	0.045	0.045	0.045	0.045	0.046	0.047	0.045	0.045	0.045	0.047	0.045	620		0.048	0.26	0.05	0.256		SD.S	0.00181659	0.0199424	0.00279285	0.0162327
	G	0.044	0.045	0.045	0.045	0.045	0.046	0.045	0.047	0.049	0.045	0.045	0.046	620		0.047	0.217	0.045	0.216		CV	0.0381637	0.0838621	0.0586733	0.0699685
	H	0.046	0.045	0.052	0.045	0.044	0.043	0.045	0.045	0.045	0.049	0.044	0.044	620		0.045	0.221	0.047	0.219		Min	0.045	0.217	0.045	0.216
																					Max	0.05	0.26	0.051	0.256
																					(Max-Min)/Max	0.1	0.165385	0.117647	0.15625
		1	2	3	4	5	6	7	8	9	10	11	12
	A	0.043	0.603	0.591	0.568	0.519	0.617	0.617	0.616	0.558	0.578	0.568	0.044	750	750	Control		Zero Field			Average	0.5796	0.5874	0.5558	0.5732
	B	0.043	0.56	0.539	0.561	0.52	0.599	0.557	0.62	0.588	0.546	0.555	0.045	750		No-LPS	LPS	No-LPS	LPS		SD.N	0.0343022	0.0245894	0.0263621	0.0273598
	C	0.044	0.044	0.044	0.043	0.044	0.044	0.044	0.041	0.045	0.045	0.043	0.046	750		0.603	0.617	0.56	0.557		SE	0.0153404	0.0109967	0.0117895	0.0122357
	D	0.044	0.044	0.049	0.037	0.036	0.04	0.043	0.042	0.037	0.046	0.046	0.044	750		0.591	0.616	0.539	0.62		Substract		0.0078		0.0174
	E	0.043	0.044	0.044	0.044	0.041	0.042	0.039	0.039	0.044	0.044	0.044	0.045	750		0.568	0.558	0.561	0.588		SD.S	0.038351	0.0274918	0.0294737	0.0305892
	F	0.043	0.043	0.044	0.042	0.043	0.045	0.045	0.045	0.045	0.043	0.044	0.045	750		0.519	0.578	0.52	0.546		CV	0.0661681	0.0468025	0.0530294	0.0533657
	G	0.041	0.045	0.045	0.044	0.045	0.044	0.042	0.043	0.038	0.046	0.046	0.045	750		0.617	0.568	0.599	0.555		Min	0.519	0.558	0.52	0.546
	H	0.045	0.045	0.046	0.046	0.044	0.046	0.036	0.038	0.046	0.046	0.046	0.043	750							Max	0.617	0.617	0.599	0.62
																					(Max-Min)/Max	0.158833	0.095624	0.131886	0.119355
	620/750	1	2	3	4	5	6	7	8	9	10	11	12			Control		Zero Field			Average	0.0824273	0.405374	0.0857377	0.404797
	A														620/750	No-LPS	LPS	No-LPS	LPS		SD.N	0.00569703	0.0334849	0.00443939	0.0176785
	B		no LPS					LPS								0.0829187	0.416532	0.0910714	0.412926	not applicaple as it is not "based on the entire population" -->	SE	0.00254779	0.0149749	0.00198535	0.00790605
	C	C	0.0829187	0.0812183	0.084507	0.0905588	0.0729335	0.416532	0.37987	0.46595	0.375433	0.389085				0.0812183	0.37987	0.0834879	0.385484		Substract		0.322946		0.319059
	D	zero field	0.0910714	0.0834879	0.0891266	0.0865385	0.0784641	0.412926	0.385484	0.435374	0.395604	0.394595				0.084507	0.46595	0.0891266	0.435374		SD.S	0.00636947	0.0374373	0.00496339	0.0197651
	E															0.0905588	0.375433	0.0865385	0.395604	appropriate, as it is a "sample of the population" -->	CV	0.0772738	0.0923526	0.0578904	0.0488273
	F															0.0729335	0.389085	0.0784641	0.394595		Min	0.0729335	0.375433	0.0784641	0.385484
	G																				Max	0.0905588	0.46595	0.0910714	0.435374
	H																				(Max-Min)/Max	0.194627	0.194264	0.138433	0.114592
							Control		Zero Field
							No-LPS	LPS	No-LPS	LPS
							0.0829187	0.416532	0.0910714	0.412926
							0.0812183	0.37987	0.0834879	0.385484
							0.084507	0.46595	0.0891266	0.435374
							0.0905588	0.375433	0.0865385	0.395604
							0.0729335	0.389085	0.0784641	0.394595
						Average	0.0824273	0.405374	0.0857377	0.404797
						SD	0.00569703	0.0334849	0.00443939	0.0176785
						SE	0.00254779	0.0149749	0.00198535	0.00790605
						Substract		0.322946		0.322369
						Error Subtract		0.0339661		0.0182273
						Normalization M Field levels
							C	M Field
						X - noLPS	0.322946	0.322369
						%	100	0.998213

## Sheet: HEKBlue_017 Sham dil
Software Version	2.04.11
Experiment File Path:	Experiment_2_ZF_D.xpt
Protocol File Path:
Plate Number	Plate 1
Date	2021-04-16
Time	11:51:37
Reader Type:	Epoch
Reader Serial Number:	1311121
Reading Type	Reader
Procedure Details
Plate Type	96 WELL PLATE
Read	Absorbance Endpoint
	Full Plate
	Wavelengths: 620
	Read Speed: Normal, Delay: 100 msec, Measurements/Data Point: 8
Results
		1	2	3	4	5	6	7	8	9	10	11	12
	A	0.046	0.051	0.048	0.046	0.048	0.047	0.262	0.273	0.263	0.253	0.246	0.046	620	620	Control		Zero Field_2				Control		Zero Field_2
	B	0.046	0.052	0.051	0.044	0.047	0.045	0.277	0.267	0.284	0.308	0.321	0.045	620		No-LPS	LPS	No-LPS	LPS			No-LPS	LPS	No-LPS	LPS
	C	0.045	0.045	0.045	0.045	0.046	0.045	0.045	0.046	0.05	0.045	0.046	0.045	620		0.051	0.262	0.052	0.277		Average	0.048	0.2594	0.0478	0.2914
	D	0.045	0.047	0.045	0.042	0.038	0.043	0.044	0.043	0.04	0.045	0.044	0.045	620		0.048	0.273	0.051	0.267		SD.N	0.00167332	0.00922171	0.00318748	0.0200459
	E	0.045	0.048	0.047	0.045	0.044	0.043	0.043	0.041	0.045	0.046	0.045	0.046	620		0.046	0.263	0.044	0.284		SE	0.000748331	0.00412408	0.00142548	0.00896482
	F	0.047	0.045	0.047	0.045	0.045	0.045	0.045	0.045	0.046	0.046	0.047	0.05	620		0.048	0.253	0.047	0.308		Substract		0.2114		0.2436
	G	0.045	0.045	0.045	0.045	0.046	0.045	0.045	0.046	0.05	0.045	0.046	0.046	620		0.047	0.246	0.045	0.321		SD.S	0.00187083	0.0103102	0.00356371	0.0224121
	H	0.046	0.047	0.045	0.042	0.038	0.043	0.044	0.043	0.04	0.045	0.044	0.044	620							CV	0.0389756	0.0397463	0.0745545	0.0769116
																					Min	0.046	0.246	0.044	0.267
																					Max	0.051	0.273	0.052	0.321
		1	2	3	4	5	6	7	8	9	10	11	12								(Max-Min)/Max	0.0980392	0.0989011	0.153846	0.168224
	A	0.043	0.481	0.428	0.436	0.451	0.437	0.692	0.625	0.571	0.657	0.581	0.044	750	750	Control		Zero Field_2				Control		Zero Field_2
	B	0.043	0.515	0.483	0.422	0.526	0.426	0.684	0.615	0.593	0.632	0.616	0.045	750		No-LPS	LPS	No-LPS	LPS			No-LPS	LPS	No-LPS	LPS
	C	0.044	0.044	0.044	0.043	0.044	0.044	0.044	0.041	0.045	0.045	0.043	0.046	750		0.481	0.692	0.515	0.684		Average	0.4466	0.6252	0.4744	0.628
	D	0.044	0.044	0.049	0.037	0.036	0.04	0.043	0.042	0.037	0.046	0.046	0.044	750		0.428	0.625	0.483	0.615		SD.N	0.0187254	0.0455298	0.0435275	0.0306268
	E	0.043	0.044	0.044	0.044	0.041	0.042	0.039	0.039	0.044	0.044	0.044	0.045	750		0.436	0.571	0.422	0.593		SE	0.00837425	0.0203615	0.0194661	0.0136967
	F	0.043	0.043	0.044	0.042	0.043	0.045	0.045	0.045	0.045	0.043	0.044	0.045	750		0.451	0.657	0.526	0.632		Substract		0.1786		0.1536
	G	0.041	0.045	0.045	0.044	0.045	0.044	0.042	0.043	0.038	0.046	0.046	0.045	750		0.437	0.581	0.426	0.616		SD.S	0.0209356	0.0509038	0.0486652	0.0342418
	H	0.045	0.045	0.046	0.046	0.044	0.046	0.036	0.038	0.046	0.046	0.046	0.043	750							CV	0.0468778	0.0814201	0.102583	0.0545251
																					Min	0.428	0.571	0.422	0.593
																					Max	0.481	0.692	0.526	0.684
	620/750	1	2	3	4	5	6	7	8	9	10	11	12		620/750	Control		Zero Field_2			(Max-Min)/Max	0.110187	0.174855	0.197719	0.133041
	A															No-LPS	LPS	No-LPS	LPS			Control		Zero Field_2
	B		no LPS					LPS								0.106029	0.378613	0.100971	0.404971			No-LPS	LPS	No-LPS	LPS
	C	C	0.106029	0.11215	0.105505	0.10643	0.107551	0.378613	0.4368	0.460595	0.385084	0.423408				0.11215	0.4368	0.10559	0.434146		Average	0.107909	0.426472	0.101211	0.480378
	D	zero field	0.100971	0.10559	0.104265	0.0893536	0.105634	0.404971	0.434146	0.478921	0.487342	0.521104				0.105505	0.460595	0.104265	0.478921		SD.N	0.00255334	0.0273562	0.00686776	0.0310104
	E															0.10643	0.385084	0.0893536	0.487342		SE	0.00114189	0.0122341	0.00307135	0.0138683
	F															0.107551	0.423408	0.105634	0.521104		Substract		0.318563		0.379167
	G																				SD.S	0.00294834	0.0315883	0.0079302	0.0358077
	H																				CV	0.0273225	0.0740688	0.0783534	0.0745407
																					Min	0.105505	0.385084	0.0893536	0.434146
																					Max	0.11215	0.460595	0.105634	0.521104
							Control		Zero Field_2												(Max-Min)/Max	0.0592508	0.163944	0.154119	0.166872
							No-LPS	LPS	No-LPS	LPS
							0.106029	0.378613	0.100971	0.404971
							0.11215	0.4368	0.10559	0.434146
							0.105505	0.460595	0.104265	0.478921
							0.10643	0.385084	0.0893536	0.487342
							0.107551	0.423408	0.105634	0.521104
						Average	0.107533	0.4169	0.101163	0.465297
						SD	0.00240438	0.0310672	0.00614346	0.0409771
						SE	0.00107527	0.0138937	0.00274744	0.0183255
						Substract		0.309367		0.357764
						Error Subtract		0.0311601		0.0414351

## Sheet: HEKBlue_018 Sham dil
Software Version	2.04.11
Experiment File Path:	C:\Users\Administrateur.CARNAVAX07\Desktop\Experiment 3_Zéro F_D.xpt
Protocol File Path:
Plate Number	Plate 1
Date	2021-04-23
Time	18:03:44
Reader Type:	Epoch
Reader Serial Number:	1311121
Reading Type	Reader
Procedure Details
Plate Type	96 WELL PLATE
Read	Absorbance Endpoint
	Full Plate
	Wavelengths: 620
	Read Speed: Normal, Delay: 100 msec, Measurements/Data Point: 8
Results
		1	2	3	4	5	6	7	8	9	10	11	12
	A	0.052	0.046	0.044	0.046	0.048	0.045	0.045	0.046	0.045	0.046	0.049	0.048	620
	B	0.045	0.053	0.046	0.046	0.049	0.046	0.243	0.248	0.262	0.266	0.259	0.045	620	620	Control		Zero Field_3				Control		Zero Field_3
	C	0.05	0.05	0.049	0.046	0.046	0.045	0.256	0.258	0.267	0.254	0.263	0.045	620		No-LPS	LPS	No-LPS	LPS			No-LPS	LPS	No-LPS	LPS
	D	0.046	0.047	0.045	0.045	0.038	0.04	0.043	0.044	0.041	0.045	0.044	0.045	620		0.053	0.243	0.05	0.256		Average	0.048	0.2556	0.0472	0.2596
	E	0.045	0.045	0.047	0.057	0.039	0.044	0.041	0.042	0.045	0.05	0.049	0.052	620		0.046	0.248	0.049	0.258		SD.N	0.00275681	0.00868562	0.00193907	0.00475815
	F	0.045	0.045	0.053	0.045	0.045	0.045	0.045	0.052	0.046	0.046	0.046	0.047	620		0.046	0.262	0.046	0.267		SE	0.00123288	0.00388433	0.000867179	0.00212791
	G	0.045	0.045	0.047	0.057	0.039	0.044	0.041	0.042	0.045	0.05	0.049	0.046	620		0.049	0.266	0.046	0.254		Substract		0.2076		0.2124
	H	0.045	0.045	0.045	0.045	0.045	0.045	0.045	0.052	0.046	0.046	0.046	0.044	620		0.046	0.259	0.045	0.263		SD.S	0.00308221	0.00971082	0.00216795	0.00531977
																					CV	0.0642126	0.0379922	0.0459311	0.0204922
																					Min	0.046	0.243	0.045	0.254
																					Max	0.053	0.266	0.05	0.267
		1	2	3	4	5	6	7	8	9	10	11	12								(Max-Min)/Max	0.132075	0.0864662	0.1	0.0486891
	A	0.043	0.712	0.632	0.7	0.708	0.649	0.677	0.71	0.733	0.81	0.673	0.044	750	750	Control		Zero Field_3				Control		Zero Field_3
	B	0.043	0.738	0.683	0.7	0.64	0.617	0.7	0.682	0.702	0.696	0.839	0.045	750		No-LPS	LPS	No-LPS	LPS			No-LPS	LPS	No-LPS	LPS
	C	0.044	0.044	0.044	0.043	0.044	0.044	0.044	0.041	0.045	0.045	0.043	0.046	750		0.712	0.677	0.738	0.7		Average	0.6802	0.7206	0.6756	0.7238
	D	0.044	0.044	0.049	0.037	0.036	0.04	0.043	0.042	0.037	0.046	0.046	0.044	750		0.632	0.71	0.683	0.682		SD.N	0.0330841	0.0498502	0.0430005	0.0580221
	E	0.043	0.044	0.044	0.044	0.041	0.042	0.039	0.039	0.044	0.044	0.044	0.045	750		0.7	0.733	0.7	0.702		SE	0.0147957	0.0222937	0.0192304	0.0259483
	F	0.043	0.043	0.044	0.042	0.043	0.045	0.045	0.045	0.045	0.043	0.044	0.045	750		0.708	0.81	0.64	0.696		Substract		0.0404		0.0482
	G	0.041	0.045	0.045	0.044	0.045	0.044	0.042	0.043	0.038	0.046	0.046	0.045	750		0.649	0.673	0.617	0.839		SD.S	0.0369892	0.0557342	0.048076	0.0648706
	H	0.045	0.045	0.046	0.046	0.044	0.046	0.036	0.038	0.046	0.046	0.046	0.043	750							CV	0.0543799	0.0773441	0.0711604	0.0896251
																					Min	0.632	0.673	0.617	0.682
																					Max	0.712	0.81	0.738	0.839
	620/750	1	2	3	4	5	6	7	8	9	10	11	12		620/750	Control		Zero Field_3			(Max-Min)/Max	0.11236	0.169136	0.163957	0.187128
	A															No-LPS	LPS	No-LPS	LPS			No-LPS		No-LPS
	B		no LPS					LPS								0.0744382	0.358936	0.0677507	0.365714			No-LPS	LPS	No-LPS	LPS
	C	C	0.0744382	0.0727848	0.0657143	0.069209	0.0708783	0.358936	0.349296	0.357435	0.328395	0.384844				0.0727848	0.349296	0.0717423	0.378299		Average	0.0696466	0.354993	0.0705663	0.359263
	D	Bipolar plus	0.0677507	0.0717423	0.0657143	0.071875	0.0729335	0.365714	0.378299	0.380342	0.364943	0.313468				0.0657143	0.357435	0.0657143	0.380342		SD.N	0.00259904	0.0202296	0.00283909	0.0270929
	E															0.069209	0.328395	0.071875	0.364943		SE	0.00116232	0.00904697	0.00126968	0.0121163
	F															0.0708783	0.384844	0.0729335	0.313468		Substract		0.285346		0.288697
	G																				SD.S	0.00300111	0.0233592	0.00327829	0.0312842
	H																				CV	0.0430905	0.0658019	0.0464569	0.0870787
																					Min	0.0657143	0.328395	0.0657143	0.313468
																					Max	0.0727848	0.384844	0.0729335	0.380342
							Control		Zero Field_3												(Max-Min)/Max	0.0971429	0.14668	0.0989841	0.175825
							No-LPS	LPS	No-LPS	LPS
							0.0744382	0.358936	0.0677507	0.365714	MIR: values were wrong transfered
							0.0727848	0.349296	0.0717423	0.378299
							0.0657143	0.357435	0.0657143	0.380342
							0.069209	0.328395	0.071875	0.364943
							0.0708783	0.384844	0.0729335	0.313468
						Average	0.0706049	0.355781	0.0700032	0.360553
						SD	0.00301289	0.0181626	0.0027779	0.0243696
						SE	0.0013474	0.00812256	0.00124232	0.0108984
						Substract		0.285176		0.289948
						Error Subtract		0.0184108		0.0245274

## Sheet: HEKBlue_019 Sham dil
Software Version	2.04.11
Experiment File Path:	I:\Controls experiment ZF\Experiment_4_D.xpt
Protocol File Path:
Plate Number	Plate 1
Date	2021-04-30
Time	12:46:33
Reader Type:	Epoch
Reader Serial Number:	1311121
Reading Type	Reader
Procedure Details
Plate Type	96 WELL PLATE
Read	Absorbance Endpoint
	Full Plate
	Wavelengths: 620
	Read Speed: Normal, Delay: 100 msec, Measurements/Data Point: 8
Results
																						Control		Zero Field_4
		1	2	3	4	5	6	7	8	9	10	11	12									No-LPS	LPS	No-LPS	LPS
	A	0.046	0.046	0.044	0.049	0.045	0.045	0.044	0.045	0.045	0.045	0.045	0.045	620	620	Control		Zero Field_4			Average	0.0482	0.2378	0.0494	0.2472
	B	0.045	0.05	0.049	0.047	0.047	0.048	0.214	0.234	0.249	0.239	0.253	0.045	620		No-LPS	LPS	No-LPS	LPS		SD.N	0.00116619	0.0137026	0.00257682	0.0183782
	C	0.045	0.051	0.053	0.046	0.047	0.05	0.232	0.239	0.245	0.237	0.283	0.045	620		0.05	0.214	0.051	0.232		SE	0.000521536	0.00612797	0.00115239	0.008219
	D	0.045	0.047	0.045	0.045	0.046	0.045	0.046	0.045	0.045	0.045	0.044	0.045	620		0.049	0.234	0.053	0.239		Substract		0.1896		0.1978
	E	0.045	0.045	0.047	0.046	0.044	0.045	0.045	0.046	0.045	0.045	0.045	0.046	620		0.047	0.249	0.046	0.245		SD.S	0.00130384	0.0153199	0.00288097	0.0205475
	F	0.045	0.047	0.045	0.045	0.046	0.05	0.046	0.045	0.045	0.045	0.044	0.047	620		0.047	0.239	0.047	0.237		CV	0.0270506	0.0644236	0.0583193	0.083121
	G	0.045	0.045	0.047	0.046	0.044	0.045	0.045	0.046	0.045	0.045	0.045	0.046	620		0.048	0.253	0.05	0.283		Min	0.047	0.214	0.046	0.232
	H	0.046	0.045	0.049	0.044	0.044	0.043	0.048	0.045	0.046	0.047	0.044	0.044	620							Max	0.05	0.253	0.053	0.283
																					(Max-Min)/Max	0.06	0.15415	0.132075	0.180212
		1	2	3	4	5	6	7	8	9	10	11	12
	A	0.043	0.557	0.517	0.474	0.548	0.51	0.551	0.483	0.397	0.541	0.478	0.044	750	750	Control		Zero Field_4			Average	0.5212	0.49	0.5084	0.4904
	B	0.043	0.56	0.465	0.524	0.525	0.468	0.595	0.516	0.502	0.444	0.395	0.045	750		No-LPS	LPS	No-LPS	LPS		SD.N	0.0295662	0.0550709	0.0365984	0.0678015
	C	0.044	0.044	0.044	0.043	0.044	0.044	0.044	0.041	0.045	0.045	0.043	0.046	750		0.557	0.551	0.56	0.595		SE	0.0132224	0.0246284	0.0163673	0.0303217
	D	0.044	0.044	0.049	0.037	0.036	0.04	0.043	0.042	0.037	0.046	0.046	0.044	750		0.517	0.483	0.465	0.516		Substract		-0.0312		-0.018
	E	0.043	0.044	0.044	0.044	0.041	0.042	0.039	0.039	0.044	0.044	0.044	0.045	750		0.474	0.397	0.524	0.502		SD.S	0.033056	0.0615711	0.0409182	0.0758044
	F	0.043	0.043	0.044	0.042	0.043	0.045	0.045	0.045	0.045	0.043	0.044	0.045	750		0.548	0.541	0.525	0.444		CV	0.0634229	0.125655	0.0804843	0.154577
	G	0.041	0.045	0.045	0.044	0.045	0.044	0.042	0.043	0.038	0.046	0.046	0.045	750		0.51	0.478	0.468	0.395		Min	0.474	0.397	0.465	0.395
	H	0.045	0.045	0.046	0.046	0.044	0.046	0.036	0.038	0.046	0.046	0.046	0.043	750							Max	0.557	0.551	0.56	0.595
																					(Max-Min)/Max	0.149013	0.279492	0.169643	0.336134
	620/750	1	2	3	4	5	6	7	8	9	10	11	12			Control		Zero Field_4			Average	0.0927169	0.494225	0.0978395	0.518276
	A														620/750	No-LPS	LPS	No-LPS	LPS		SD.N	0.0045757	0.0811926	0.010559	0.109491
	B		no LPS					LPS								0.0897666	0.388385	0.0910714	0.389916	not applicaple as it is not "based on the entire population" -->	SE	0.00204632	0.0363104	0.00472211	0.0489659
	C	C	0.0897666	0.0947776	0.0991561	0.0857664	0.0941176	0.388385	0.484472	0.627204	0.441774	0.529289				0.0947776	0.484472	0.113978	0.463178		Substract		0.401508		0.420437
	D	Zero Field	0.0910714	0.113978	0.0877863	0.0895238	0.106838	0.389916	0.463178	0.488048	0.533784	0.716456				0.0991561	0.627204	0.0877863	0.488048		SD.S	0.00511579	0.0907761	0.0118053	0.122415
	E															0.0857664	0.441774	0.0895238	0.533784	appropriate, as it is a "sample of the population" -->	CV	0.0551765	0.183674	0.12066	0.236196
	F															0.0941176	0.529289	0.106838	0.716456		Min	0.0857664	0.388385	0.0877863	0.389916
	G																				Max	0.0991561	0.627204	0.113978	0.716456
	H																				(Max-Min)/Max	0.135036	0.380768	0.2298	0.455771
							Control		Zero Field_4
							No-LPS	LPS	No-LPS	LPS
							0.0897666	0.388385	0.0910714	0.389916
							0.0947776	0.484472	0.113978	0.463178
							0.0991561	0.627204	0.0877863	0.488048
							0.0857664	0.441774	0.0895238	0.533784
							0.0941176	0.529289	0.106838	0.716456
						Average	0.0927169	0.494225	0.0978395	0.518276
						SD	0.0045757	0.0811926	0.010559	0.109491
						SE	0.00204632	0.0363104	0.00472211	0.0489659
						Substract		0.401508		0.425559
						Error Subtract		0.0813215		0.109999
						Normalization M Field levels
							C	M Field
						X - noLPS	0.401508	0.425559
						%	100	1.0599

## Sheet: HEKBlue_020 Sham dil
Software Version	2.04.11
Experiment File Path:	I:\Controls experiment ZF\Experiment_5_D.xpt
Protocol File Path:
Plate Number	Plate 1
Date	2021-05-07
Time	12:00:44
Reader Type:	Epoch
Reader Serial Number:	1311121
Reading Type	Reader
Procedure Details
Plate Type	96 WELL PLATE
Read	Absorbance Endpoint
	Full Plate
	Wavelengths: 620
	Read Speed: Normal, Delay: 100 msec, Measurements/Data Point: 8
Results
																						Control		Zero Field_5
																						No-LPS	LPS	No-LPS	LPS
		1	2	3	4	5	6	7	8	9	10	11	12		0	Control		Zero Field_5			Average	0.0474	0.249	0.047	0.2522
	A	0.044	0.047	0.048	0.05	0.047	0.045	0.243	0.233	0.265	0.254	0.25	0.045	620		No-LPS	LPS	No-LPS	LPS		SD.N	0.00162481	0.0107145	0.000894427	0.0239783
	B	0.045	0.048	0.046	0.048	0.046	0.047	0.233	0.23	0.271	0.237	0.29	0.046	620		0.047	0.243	0.048	0.233		SE	0.000726636	0.00479166	0.0004	0.0107234
	C	0.045	0.046	0.044	0.045	0.045	0.045	0.044	0.046	0.046	0.045	0.045	0.045	620		0.048	0.233	0.046	0.23		Substract		0.2016		0.2052
	D	0.046	0.045	0.047	0.035	0.039	0.039	0.037	0.04	0.039	0.045	0.045	0.045	620		0.05	0.265	0.048	0.271		SD.S	0.00181659	0.0119791	0.001	0.0268086
	E	0.045	0.045	0.046	0.038	0.041	0.037	0.038	0.038	0.046	0.044	0.051	0.045	620		0.047	0.254	0.046	0.237		CV	0.0383247	0.048109	0.0212766	0.106299
	F	0.046	0.044	0.046	0.045	0.046	0.045	0.045	0.047	0.046	0.045	0.046	0.045	620		0.045	0.25	0.047	0.29		Min	0.045	0.233	0.046	0.23
	G	0.046	0.045	0.047	0.035	0.039	0.039	0.037	0.04	0.039	0.045	0.045	0.045	620							Max	0.05	0.265	0.048	0.29
	H	0.045	0.045	0.046	0.038	0.041	0.037	0.038	0.038	0.046	0.044	0.044	0.044	620							(Max-Min)/Max	0.1	0.120755	0.0416667	0.206897
		1	2	3	4	5	6	7	8	9	10	11	12
	A	0.043	0.551	0.576	0.617	0.63	0.499	0.606	0.537	0.56	0.579	0.532	0.044	750	750	Control		Zero Field_5			Average	0.5746	0.5628	0.578	0.5688
	B	0.043	0.643	0.629	0.538	0.557	0.523	0.599	0.57	0.526	0.609	0.54	0.045	750		No-LPS	LPS	No-LPS	LPS		SD.N	0.0472042	0.027389	0.0487688	0.0322205
	C	0.044	0.044	0.044	0.043	0.044	0.044	0.044	0.041	0.045	0.045	0.043	0.046	750		0.551	0.606	0.643	0.599		SE	0.0211104	0.0122488	0.0218101	0.0144094
	D	0.044	0.044	0.049	0.037	0.036	0.04	0.043	0.042	0.037	0.046	0.046	0.044	750		0.576	0.537	0.629	0.57		Substract		-0.0118		-0.0092
	E	0.043	0.044	0.044	0.044	0.041	0.042	0.039	0.039	0.044	0.044	0.044	0.045	750		0.617	0.56	0.538	0.526		SD.S	0.0527759	0.0306219	0.0545252	0.0360236
	F	0.043	0.043	0.044	0.042	0.043	0.045	0.045	0.045	0.045	0.043	0.044	0.045	750		0.63	0.579	0.557	0.609		CV	0.0918481	0.0544099	0.0943343	0.0633326
	G	0.041	0.045	0.045	0.044	0.045	0.044	0.042	0.043	0.038	0.046	0.046	0.045	750		0.499	0.532	0.523	0.54		Min	0.499	0.532	0.523	0.526
	H	0.045	0.045	0.046	0.046	0.044	0.046	0.036	0.038	0.046	0.046	0.046	0.043	750							Max	0.63	0.606	0.643	0.609
																					(Max-Min)/Max	0.207937	0.122112	0.186625	0.136289
	620/750	1	2	3	4	5	6	7	8	9	10	11	12			Control		Zero Field_5			Average	0.0828907	0.443342	0.0818906	0.44678
	A														620/750	No-LPS	LPS	No-LPS	LPS		SD.N	0.00512358	0.0264713	0.00702768	0.0653631
	B		no LPS					LPS								0.0852995	0.40099	0.0746501	0.388982	not applicaple as it is not "based on the entire population" -->	SE	0.00229134	0.0118383	0.00314287	0.0292313
	C	C	0.0852995	0.0833333	0.0810373	0.0746032	0.0901804	0.40099	0.433892	0.473214	0.438687	0.469925				0.0833333	0.433892	0.073132	0.403509		Substract		0.360451		0.364889
	D	Zero Field	0.0746501	0.073132	0.0892193	0.0825853	0.0898662	0.388982	0.403509	0.515209	0.389163	0.537037				0.0810373	0.473214	0.0892193	0.515209		SD.S	0.00572834	0.0295958	0.00785718	0.0730782
	E															0.0746032	0.438687	0.0825853	0.389163	appropriate, as it is a "sample of the population" -->	CV	0.0691071	0.0667562	0.0959474	0.163566
	F															0.0901804	0.469925	0.0898662	0.537037		Min	0.0746032	0.40099	0.073132	0.388982
	G																				Max	0.0901804	0.473214	0.0898662	0.537037
	H																				(Max-Min)/Max	0.172734	0.152625	0.186212	0.275689
							Control		Zero Field_5
							No-LPS	LPS	No-LPS	LPS
							0.0852995	0.40099	0.0746501	0.388982
							0.0833333	0.433892	0.073132	0.403509
							0.0810373	0.473214	0.0892193	0.515209
							0.0746032	0.438687	0.0825853	0.389163
							0.0901804	0.469925	0.0898662	0.537037
						Average	0.0828907	0.443342	0.0818906	0.44678
						SD	0.00512358	0.0264713	0.00702768	0.0653631
						SE	0.00229134	0.0118383	0.00314287	0.0292313
						Substract		0.360451		0.363889
						Error Subtract		0.0269626		0.0657398
						Normalization M Field levels
							C	M Field
						X - noLPS	0.360451	0.363889
						%	100	1.00954

## Sheet: HEKBlue_021_1 low f19D50 dil
Software Version	2.04.11
Experiment File Path:	C:\Users\Administrateur.CARNAVAX07\Desktop\inflammation _Blanche_21-08\Experiment_19Hz_bas_620nm_D.xpt
Protocol File Path:
Plate Number	Plate 1
Date	2021-09-03
Time	13:03:52
Reader Type:	Epoch
Reader Serial Number:	1311121
Reading Type	Reader
Procedure Details
Plate Type	96 WELL PLATE
Read	Absorbance Endpoint
	Full Plate
	Wavelengths: 620
	Read Speed: Normal, Delay: 100 msec, Measurements/Data Point: 8
Results
																						021_ctrl_dil_LOW		021_19Hz_dil_LOW
		1	2	3	4	5	6	7	8	9	10	11	12									No-LPS	LPS	No-LPS	LPS
	A	0.046	0.053	0.06	0.06	0.064	0.061	0.196	0.222	0.203	0.203	0.195	0.04	620	620	021_ctrl_dil_LOW		021_19Hz_dil_LOW			Average	0.0596	0.2038	0.058	0.2074
	B	0.046	0.057	0.058	0.059	0.058	0.058	0.201	0.221	0.209	0.202	0.204	0.047	620		No-LPS	LPS	No-LPS	LPS		SD.N	0.00361109	0.00970361	0.000632456	0.00733757
	C	0.054	0.048	0.047	0.047	0.047	0.048	0.047	0.047	0.05	0.045	0.047	0.036	620		0.053	0.196	0.057	0.201		SE	0.00161493	0.00433959	0.000282843	0.00328146
	D	0.049	0.048	0.047	0.047	0.047	0.048	0.047	0.047	0.05	0.045	0.047	0.049	620		0.06	0.222	0.058	0.221		Substract		0.1442		0.1494
	E	0.051	0.048	0.047	0.047	0.047	0.048	0.047	0.047	0.05	0.045	0.047	0.036	620		0.06	0.203	0.059	0.209		SD.S	0.00403733	0.010849	0.000707107	0.00820366
	F	0.045	0.048	0.047	0.047	0.047	0.048	0.047	0.047	0.05	0.045	0.047	0.046	620		0.064	0.203	0.058	0.202		CV	0.0677404	0.0532334	0.0121915	0.0395548
	G	0.044	0.048	0.047	0.047	0.047	0.048	0.047	0.047	0.05	0.045	0.047	0.047	620		0.061	0.195	0.058	0.204		Min	0.053	0.195	0.057	0.201
	H	0.047	0.048	0.047	0.047	0.047	0.048	0.047	0.047	0.05	0.045	0.047	0.038	620							Max	0.064	0.222	0.059	0.221
																					(Max-Min)/Max	0.171875	0.121622	0.0338983	0.0904977
		1	2	3	4	5	6	7	8	9	10	11	12
	A	0.042	0.904	0.988	0.906	0.865	0.787	0.742	0.851	0.988	0.649	0.687	0.044	750	750	021_ctrl_dil_LOW		021_19Hz_dil_LOW			Average	0.89	0.7834	0.845	0.814
	B	0.045	0.763	0.91	0.862	0.784	0.906	0.987	0.803	0.659	0.689	0.932	0.044	750		No-LPS	LPS	No-LPS	LPS		SD.N	0.0652534	0.122883	0.0611228	0.129324
	C	0.045	0.044	0.044	0.045	0.043	0.044	0.043	0.045	0.043	0.045	0.044	0.044	750		0.904	0.742	0.763	0.987		SE	0.0291822	0.054955	0.027335	0.0578356
	D	0.045	0.044	0.044	0.041	0.042	0.04	0.042	0.043	0.042	0.044	0.045	0.045	750		0.988	0.851	0.91	0.803		Substract		-0.1066		-0.031
	E	0.044	0.044	0.043	0.044	0.039	0.039	0.043	0.043	0.045	0.046	0.044	0.047	750		0.906	0.988	0.862	0.659		SD.S	0.0729555	0.137387	0.0683374	0.144589
	F	0.044	0.044	0.042	0.043	0.043	0.044	0.045	0.045	0.043	0.043	0.043	0.045	750		0.865	0.649	0.784	0.689		CV	0.0819724	0.175373	0.0808727	0.177628
	G	0.042	0.044	0.043	0.044	0.039	0.039	0.043	0.043	0.045	0.046	0.044	0.042	750		0.787	0.687	0.906	0.932		Min	0.787	0.649	0.763	0.659
	H	0.046	0.044	0.042	0.043	0.043	0.044	0.045	0.045	0.043	0.043	0.043	0.049	750							Max	0.988	0.988	0.91	0.987
																					(Max-Min)/Max	0.203441	0.343117	0.161538	0.33232
	620/750	1	2	3	4	5	6	7	8	9	10	11	12
	A														620/750	021_ctrl_dil_LOW		021_19Hz_dil_LOW			Average	0.067416	0.265424	0.0689768	0.261615
	B		no LPS					LPS								No-LPS	LPS	No-LPS	LPS	not applicaple as it is not "based on the entire population" -->	SD.N	0.00732717	0.0352138	0.00469425	0.0434771
	C	C	0.0586283	0.0607287	0.0662252	0.0739884	0.0775095	0.264151	0.26087	0.205466	0.312789	0.283843				0.0586283	0.264151	0.0747051	0.203647		SE	0.00327681	0.0157481	0.00209933	0.0194435
	D	Bipolar plus	0.0747051	0.0637363	0.0684455	0.0739796	0.0640177	0.203647	0.275218	0.317147	0.293179	0.218884				0.0607287	0.26087	0.0637363	0.275218		Substract		0.198008		0.192638
	E															0.0662252	0.205466	0.0684455	0.317147	appropriate, as it is a "sample of the population" -->	SD.S	0.00819203	0.0393702	0.00524833	0.0486089
	F															0.0739884	0.312789	0.0739796	0.293179		CV	0.121514	0.14833	0.0760884	0.185803
	G															0.0775095	0.283843	0.0640177	0.218884		Min	0.0586283	0.205466	0.0637363	0.203647
	H																				Max	0.0775095	0.312789	0.0747051	0.317147
																					(Max-Min)/Max	0.243599	0.343117	0.146829	0.357877
							021_ctrl_dil_LOW		021_19Hz_dil_LOW
							No-LPS	LPS	No-LPS	LPS
							0.0586283	0.264151	0.0747051	0.203647
							0.0607287	0.26087	0.0637363	0.275218
							0.0662252	0.205466	0.0684455	0.317147
							0.0739884	0.312789	0.0739796	0.293179
							0.0775095	0.283843	0.0640177	0.218884
						Average	0.067416	0.265424	0.0689768	0.261615
						SD	0.00732717	0.0352138	0.00469425	0.0434771
						SE	0.00327681	0.0157481	0.00209933	0.0194435
						Substract		0.198008		0.194199
						Error Subtract		0.035968		0.0437298
						Normalization M Field levels
							C	M Field
						X - noLPS	0.198008	0.194199
						%	100	0.980766

## Sheet: HEKBlue_021_2 low f19D50 dil
Software Version	2.04.11
Experiment File Path:	C:\Users\Administrateur.CARNAVAX07\Desktop\inflammation _Blanche_21-08\Manip_10-09-2021\Experiment_19Hz_bas_620nm_D.xpt
Protocol File Path:
Plate Number	Plate 1
Date	2021-09-10
Time	13:04:42
Reader Type:	Epoch
Reader Serial Number:	1311121
Reading Type	Reader
Procedure Details
Plate Type	96 WELL PLATE
Read	Absorbance Endpoint
	Full Plate
	Wavelengths: 620
	Read Speed: Normal, Delay: 100 msec, Measurements/Data Point: 8
Results
		1	2	3	4	5	6	7	8	9	10	11	12
	A	0.044	0.052	0.047	0.045	0.048	0.048	0.286	0.284	0.262	0.265	0.273	0.046	620	620	021_ctrl_dil_repeat_02_LOW		021_19Hz_dil_repeat_02_LOW				021_ctrl_dil_repeat_02_LOW		021_19Hz_dil_repeat_02_LOW
	B	0.046	0.049	0.049	0.047	0.046	0.049	0.277	0.262	0.263	0.267	0.272	0.046	620		No-LPS	LPS	No-LPS	LPS			No-LPS	LPS	No-LPS	LPS
	C	0.045	0.045	0.047	0.045	0.045	0.048	0.047	0.048	0.046	0.048	0.045	0.045	620		0.052	0.286	0.049	0.277		Average	0.048	0.274	0.048	0.2682
	D	0.046	0.046	0.047	0.04	0.04	0.041	0.04	0.044	0.045	0.047	0.046	0.047	620		0.047	0.284	0.049	0.262		SD.N	0.00228035	0.00969536	0.00126491	0.0056356
	E	0.045	0.045	0.045	0.045	0.04	0.043	0.043	0.043	0.046	0.047	0.051	0.047	620		0.045	0.262	0.047	0.263		SE	0.0010198	0.0043359	0.000565685	0.00252032
	F	0.046	0.045	0.045	0.046	0.047	0.049	0.045	0.045	0.045	0.046	0.046	0.046	620		0.048	0.265	0.046	0.267		Substract		0.226		0.2202
	G	0.045	0.046	0.047	0.04	0.04	0.041	0.04	0.044	0.045	0.047	0.046	0.046	620		0.048	0.273	0.049	0.272		SD.S	0.00254951	0.0108397	0.00141421	0.00630079
	H	0.047	0.045	0.045	0.045	0.04	0.043	0.043	0.043	0.046	0.047	0.051	0.044	620							CV	0.0531148	0.0395611	0.0294628	0.0234929
																					Min	0.045	0.262	0.046	0.262
																					Max	0.052	0.286	0.049	0.277
		1	2	3	4	5	6	7	8	9	10	11	12								(Max-Min)/Max	0.134615	0.0839161	0.0612245	0.0541516
	A	0.042	0.695	0.76	0.691	0.779	0.79	0.754	0.735	0.703	0.709	0.681	0.044	750	750	021_ctrl_dil_repeat_02_LOW		021_19Hz_dil_repeat_02_LOW				021_ctrl_dil_repeat_02_LOW		021_19Hz_dil_repeat_02_LOW
	B	0.045	0.754	0.814	0.812	0.779	0.769	0.765	0.758	0.73	0.739	0.668	0.044	750		No-LPS	LPS	No-LPS	LPS			No-LPS	LPS	No-LPS	LPS
	C	0.045	0.044	0.044	0.045	0.043	0.044	0.043	0.045	0.043	0.045	0.044	0.044	750		0.695	0.754	0.754	0.765		Average	0.743	0.7164	0.7856	0.732
	D	0.045	0.044	0.044	0.041	0.042	0.04	0.042	0.043	0.042	0.044	0.045	0.045	750		0.76	0.735	0.814	0.758		SD.N	0.0419571	0.0254841	0.0237537	0.0343919
	E	0.044	0.044	0.043	0.044	0.039	0.039	0.043	0.043	0.045	0.046	0.044	0.047	750		0.691	0.703	0.812	0.73		SE	0.0187638	0.0113968	0.010623	0.0153805
	F	0.044	0.044	0.042	0.043	0.043	0.044	0.045	0.045	0.043	0.043	0.043	0.045	750		0.779	0.709	0.779	0.739		Substract		-0.0266		-0.0536
	G	0.042	0.044	0.043	0.044	0.039	0.039	0.043	0.043	0.045	0.046	0.044	0.042	750		0.79	0.681	0.769	0.668		SD.S	0.0469095	0.0284921	0.0265575	0.0384513
	H	0.046	0.044	0.042	0.043	0.043	0.044	0.045	0.045	0.043	0.043	0.043	0.049	750							CV	0.0631352	0.0397712	0.0338054	0.0525291
																					Min	0.691	0.681	0.754	0.668
																					Max	0.79	0.754	0.814	0.765
	620/750	1	2	3	4	5	6	7	8	9	10	11	12			021_ctrl_dil_repeat_02_LOW		021_19Hz_dil_repeat_02_LOW			(Max-Min)/Max	0.125316	0.096817	0.0737101	0.126797
	A														620/750	No-LPS	LPS	No-LPS	LPS			021_ctrl_dil_repeat_02_LOW		021_19Hz_dil_repeat_02_LOW
	B		no LPS					LPS								0.0748201	0.37931	0.0649867	0.362092			No-LPS	LPS	No-LPS	LPS
	C	C	0.0748201	0.0618421	0.065123	0.0616175	0.0607595	0.37931	0.386395	0.372688	0.373766	0.400881				0.0618421	0.386395	0.0601966	0.345646		Average	0.0623355	0.383432	0.0602119	0.368601
	D	19Hz-Bipolar plus	0.0649867	0.0601966	0.0578818	0.0590501	0.0637191	0.362092	0.345646	0.360274	0.361299	0.407186				0.065123	0.372688	0.0578818	0.360274		SD.N	0.00165929	0.0114248	0.00218404	0.0231211
	E															0.0616175	0.373766	0.0590501	0.361299		SE	0.000742059	0.00510932	0.000976733	0.0103401
	F															0.0607595	0.400881	0.0637191	0.407186		Substract		0.321097		0.308389
	G																				SD.S	0.00191599	0.0131922	0.00252191	0.026698
	H																				CV	0.0307367	0.0344056	0.041884	0.0724305
																					Min	0.0607595	0.372688	0.0578818	0.345646
																					Max	0.065123	0.400881	0.0637191	0.407186
							021_ctrl_dil_repeat_02_LOW		021_19Hz_dil_repeat_02_LOW												(Max-Min)/Max	0.0670042	0.0703265	0.0916105	0.151133
							No-LPS	LPS	No-LPS	LPS
							0.0748201	0.37931	0.0649867	0.362092
							0.0618421	0.386395	0.0601966	0.345646
							0.065123	0.372688	0.0578818	0.360274
							0.0616175	0.373766	0.0590501	0.361299
							0.0607595	0.400881	0.0637191	0.407186
						Average	0.0648324	0.382608	0.0611669	0.367299
						SD	0.00520972	0.0103508	0.00273202	0.0208434
						SE	0.00232986	0.00462903	0.00122179	0.00932147
						Substract		0.317776		0.302467
						Error Subtract		0.011588		0.0210217
						Normalization M Field levels
							C	M Field
						X - noLPS	0.317776	0.302467
						%	100	0.951825

## Sheet: HEKBlue_021_3 low f19D50 dil
Software Version	2.04.11
Experiment File Path:	I:\Manip_10-09-2021\exper_17-09-21\Experiment_19Hz_620nm_D.xpt
Protocol File Path:
Plate Number	Plate 1
Date	2021-09-17
Time	13:05:15
Reader Type:	Epoch
Reader Serial Number:	1311121
Reading Type	Reader
Procedure Details
Plate Type	96 WELL PLATE
Read	Absorbance Endpoint
	Full Plate
	Wavelengths: 620
	Read Speed: Normal, Delay: 100 msec, Measurements/Data Point: 8
Results
		1	2	3	4	5	6	7	8	9	10	11	12
	A	0.044	0.047	0.045	0.047	0.047	0.047	0.267	0.261	0.264	0.267	0.258	0.045	620	620	021_ctrl_dil_repeat_03		021_19Hz_dil_repeat_03				021_ctrl_dil_repeat_03		021_19Hz_dil_repeat_03
	B	0.045	0.051	0.044	0.046	0.044	0.043	0.257	0.247	0.256	0.251	0.248	0.046	620		No-LPS	LPS	No-LPS	LPS			No-LPS	LPS	No-LPS	LPS
	C	0.046	0.046	0.045	0.043	0.045	0.045	0.045	0.046	0.046	0.046	0.047	0.051	620		0.047	0.267	0.051	0.257		Average	0.0466	0.2634	0.0456	0.2518
	D	0.047	0.045	0.045	0.037	0.04	0.041	0.042	0.04	0.039	0.045	0.046	0.045	620		0.045	0.261	0.044	0.247		SD.N	0.0008	0.00349857	0.00287054	0.0040694
	E	0.047	0.045	0.046	0.046	0.039	0.038	0.04	0.04	0.046	0.045	0.046	0.045	620		0.047	0.264	0.046	0.256		SE	0.000357771	0.00156461	0.00128374	0.00181989
	F	0.048	0.045	0.046	0.045	0.047	0.045	0.048	0.047	0.046	0.045	0.047	0.045	620		0.047	0.267	0.044	0.251		Substract		0.2168		0.2062
	G	0.044	0.045	0.045	0.037	0.04	0.041	0.042	0.04	0.039	0.045	0.046	0.046	620		0.047	0.258	0.043	0.248		SD.S	0.000894427	0.00391152	0.00320936	0.00454973
	H	0.045	0.045	0.046	0.046	0.039	0.038	0.04	0.04	0.046	0.045	0.046	0.046	620							CV	0.0191937	0.0148501	0.0703807	0.0180688
																					Min	0.045	0.258	0.043	0.247
																					Max	0.047	0.267	0.051	0.257
		1	2	3	4	5	6	7	8	9	10	11	12								(Max-Min)/Max	0.0425532	0.0337079	0.156863	0.0389105
	A	0.042	0.833	0.819	0.807	0.813	0.762	0.79	0.814	0.811	0.8	0.803	0.044	750	750	021_ctrl_dil_repeat_03		021_19Hz_dil_repeat_03				021_ctrl_dil_repeat_03		021_19Hz_dil_repeat_03
	B	0.045	0.92	0.814	0.762	0.799	0.721	0.757	0.782	0.805	0.797	0.807	0.044	750		No-LPS	LPS	No-LPS	LPS			No-LPS	LPS	No-LPS	LPS
	C	0.045	0.044	0.044	0.045	0.043	0.044	0.043	0.045	0.043	0.045	0.044	0.044	750		0.833	0.79	0.92	0.757		Average	0.8068	0.8036	0.8032	0.7896
	D	0.045	0.044	0.044	0.041	0.042	0.04	0.042	0.043	0.042	0.044	0.045	0.045	750		0.819	0.814	0.814	0.782		SD.N	0.0240033	0.00849941	0.0666795	0.0185213
	E	0.044	0.044	0.043	0.044	0.039	0.039	0.043	0.043	0.045	0.046	0.044	0.047	750		0.807	0.811	0.762	0.805		SE	0.0107346	0.00380105	0.02982	0.00828299
	F	0.044	0.044	0.042	0.043	0.043	0.044	0.045	0.045	0.043	0.043	0.043	0.045	750		0.813	0.8	0.799	0.797		Substract		-0.0032		-0.0136
	G	0.042	0.044	0.043	0.044	0.039	0.039	0.043	0.043	0.045	0.046	0.044	0.042	750		0.762	0.803	0.721	0.807		SD.S	0.0268365	0.00950263	0.07455	0.0207075
	H	0.046	0.044	0.042	0.043	0.043	0.044	0.045	0.045	0.043	0.043	0.043	0.049	750							CV	0.0332629	0.0118251	0.0928162	0.0262253
																					Min	0.762	0.79	0.721	0.757
																					Max	0.833	0.814	0.92	0.807
	620/750	1	2	3	4	5	6	7	8	9	10	11	12			021_ctrl_dil_repeat_03		021_19Hz_dil_repeat_03			(Max-Min)/Max	0.0852341	0.029484	0.216304	0.0619579
	A														620/750	No-LPS	LPS	No-LPS	LPS			021_ctrl_dil_repeat_03		021_19Hz_dil_repeat_03
	B		no LPS					LPS								0.0564226	0.337975	0.0554348	0.339498			No-LPS	LPS	No-LPS	LPS
	C	C	0.0564226	0.0549451	0.0582404	0.0578106	0.0616798	0.337975	0.320639	0.325524	0.33375	0.321295				0.0549451	0.320639	0.0540541	0.315857		Average	0.058169	0.325302	0.0572824	0.314028
	D	Bipolar plus	0.0554348	0.0540541	0.0603675	0.0550688	0.0596394	0.339498	0.315857	0.318012	0.314931	0.307311				0.0582404	0.325524	0.0603675	0.318012		SD.N	0.00239024	0.00522537	0.00275658	0.00403587
	E															0.0578106	0.33375	0.0550688	0.314931		SE	0.00106895	0.00233686	0.00123278	0.0018049
	F															0.0616798	0.321295	0.0596394	0.307311		Substract		0.267133		0.256745
	G																				SD.S	0.00276001	0.00603374	0.00318303	0.00466023
	H																				CV	0.0474482	0.0185481	0.0555673	0.0148402
																					Min	0.0549451	0.320639	0.0540541	0.307311
																					Max	0.0616798	0.33375	0.0603675	0.318012
							021_ctrl_dil_repeat_03		021_19Hz_dil_repeat_03												(Max-Min)/Max	0.109189	0.0392844	0.104583	0.0336509
							No-LPS	LPS	No-LPS	LPS
							0.0564226	0.337975	0.0554348	0.339498
							0.0549451	0.320639	0.0540541	0.315857
							0.0582404	0.325524	0.0603675	0.318012
							0.0578106	0.33375	0.0550688	0.314931
							0.0616798	0.321295	0.0596394	0.307311
						Average	0.0578197	0.327837	0.0569129	0.319122
						SD	0.00224913	0.00689486	0.00257395	0.0108087
						SE	0.00100584	0.00308348	0.00115111	0.00483379
						Substract		0.270017		0.261302
						Error Subtract		0.00725243		0.0111109
						Normalization M Field levels
							C	M Field
						X - noLPS	0.270017	0.261302
						%	100	0.967725

## Sheet: HEKBlue_021_4 f19D50 dil
Software Version	2.04.11
Experiment File Path:	I:\Experiment_19Hz_620nm.xpt
Protocol File Path:
Plate Number	Plate 1
Date	2022-08-01
Time	12:06:56
Reader Type:	Epoch
Reader Serial Number:	1311121
Reading Type	Reader
Procedure Details
Plate Type	96 WELL PLATE
Read	Absorbance Endpoint
	Full Plate
	Wavelengths: 620
	Read Speed: Normal, Delay: 100 msec, Measurements/Data Point: 8
Results
		1	2	3	4	5	6	7	8	9	10	11	12
	A	0.044	0.052	0.054	0.05	0.052	0.054	0.303	0.316	0.289	0.299	0.307	0.045	620
	B	0.045	0.054	0.053	0.052	0.051	0.052	0.287	0.289	0.269	0.324	0.312	0.046	620
	C	0.046	0.046	0.045	0.042	0.045	0.045	0.045	0.046	0.046	0.046	0.047	0.051	620
	D	0.047	0.045	0.045	0.035	0.04	0.04	0.041	0.04	0.039	0.045	0.046	0.045	620
	E	0.047	0.045	0.045	0.046	0.038	0.038	0.04	0.039	0.046	0.045	0.046	0.045	620
	F	0.048	0.045	0.046	0.045	0.046	0.045	0.048	0.047	0.046	0.045	0.046	0.045	620
	G	0.044	0.037	0.037	0.038	0.038	0.037	0.038	0.038	0.038	0.038	0.038	0.046	620
	H	0.045	0.04	0.037	0.038	0.037	0.036	0.038	0.038	0.039	0.042	0.037	0.046	620
		1	2	3	4	5	6	7	8	9	10	11	12
	A	0.042	0.569	0.554	0.517	0.527	0.547	0.53	0.519	0.52	0.499	0.497	0.044	750
	B	0.045	0.502	0.569	0.564	0.558	0.543	0.532	0.521	0.533	0.523	0.513	0.044	750
	C	0.045	0.044	0.044	0.045	0.043	0.044	0.043	0.045	0.043	0.045	0.044	0.044	750
	D	0.045	0.044	0.044	0.041	0.042	0.04	0.042	0.043	0.042	0.044	0.045	0.045	750
	E	0.044	0.044	0.043	0.044	0.039	0.039	0.043	0.043	0.045	0.046	0.044	0.047	750
	F	0.044	0.044	0.042	0.043	0.043	0.044	0.045	0.045	0.043	0.043	0.043	0.045	750
	G	0.042	0.044	0.043	0.044	0.039	0.039	0.043	0.043	0.045	0.046	0.044	0.042	750
	H	0.046	0.044	0.042	0.043	0.043	0.044	0.045	0.045	0.043	0.043	0.043	0.049	750
	620/750	1	2	3	4	5	6	7	8	9	10	11	12
	A
	B		no LPS					LPS
	C	C	0.0913884	0.0974729	0.0967118	0.0986717	0.0987203	0.571698	0.608863	0.555769	0.599198	0.617706
	D	19Hz-Bipolar plus	0.10757	0.0931459	0.0921986	0.0913978	0.0957643	0.539474	0.554702	0.50469	0.619503	0.608187
	E
	F
	G
	H
							021_ctrl_dil_repeat_04		021_19Hz_dil_repeat_04
							No-LPS	LPS	No-LPS	LPS
							0.0913884	0.571698	0.10757	0.539474
							0.0974729	0.608863	0.0931459	0.554702
							0.0967118	0.555769	0.0921986	0.50469
							0.0986717	0.599198	0.0913978	0.619503
							0.0987203	0.617706	0.0957643	0.608187
						Average	0.096593	0.590647	0.0960153	0.565311
						SD	0.00271008	0.0232924	0.00596137	0.0429653
						SE	0.00121199	0.0104167	0.002666	0.0192147
						Substract		0.494054		0.468718
						Error Subtract		0.0234495		0.0433769
						Normalization M Field levels
							C	M Field
						X - noLPS	0.494054	0.468718
						%	100	0.948719

[truncated: 22 more sheets: HEKBlue_011 f10D50 dil, HEKBlue_012 high f10D50 dil, HEKBlue_013 f10D50 dil, HEKBlue_014 f10D50 dil, HEKBlue_015_1 f10D50 dil, HEKBlue_015_2 f10D50 dil, HEKBlue_015_3 f10D50 dil, HEKBlue_033_1 f10D50 dil, HEKBlue_025_1 f19D95 dil, HEKBlue_025_2 f19D95 dil, HEKBlue_025_3 f19D95 dil, HEKBlue_025_4 f19D95 dil, HEKBlue_026_1 f10D26 dil, HEKBlue_026_2 f10D26 dil, HEKBlue_026_3 f10D26 dil, HEKBlue_028 CIT81 dil, HEKBlue_030_2 CIT81 dil, HEKBlue_030_3 CIT81 dil, HEKBlue_030_4 CIT81 dil, HEKBlue_031_1 CIT96 dil …]
